# Supplementary material for: A Au nanoparticle anchored stannatranone-pillared MOF as a duo-active electrocatalyst for overall water splitting
Source: Royal Society of Chemistry journal article supplement (doi:10.1039/d4nj01121j), 2024-01-01
Supplement: d4nj01121j1.pdf [file d4nj01121j1.pdf]

## Supporting Information

### Au Nanoparticle anchored Stannatranone-pillared MOF as duo-active electrocatalyst for Overall Water Splitting

Jyoti Rohilla<sup>a</sup>, Sahil Thakur<sup>a</sup>, Keshav Kumar<sup>a</sup>, Raghubir Singh<sup>b\*</sup>, Varinder Kaur<sup>a\*</sup>

<sup>a</sup>Department of Chemistry, Panjab University, Sector 14, Chandigarh-160014, India

<sup>b</sup>Department of Chemistry, DAV College, Sector 10, Chandigarh-160011, India

\*Corresponding author: [var\\_ka04@yahoo.co.in](mailto:var_ka04@yahoo.co.in) (V.K.), [raghubirsingh@davchd.ac.in](mailto:raghubirsingh@davchd.ac.in) (R.S.)

| List of Figures   |                                                                                                                            |           |
|-------------------|----------------------------------------------------------------------------------------------------------------------------|-----------|
| <b>Figure S1</b>  | Photograph of three-electrode electrochemical cell for overall water splitting                                             | <b>S2</b> |
| <b>Figure S2</b>  | (a) Asymmetric unit of Sn-Na MOF, (b) 2D coordination array in Sn-Na MOF.                                                  | <b>S2</b> |
| <b>Figure S3</b>  | Combined FTIR spectra of the Sn-Na MOF and Au NPs/Sn-Na MOF                                                                | <b>S3</b> |
| <b>Figure S4</b>  | XPS of (a) C 1s (Au NPs/Sn-Na MOF), (b) O 1s (Au NPs/Sn-Na MOF)                                                            | <b>S3</b> |
| <b>Figure S5</b>  | PXRD spectra of Au Nps/Sn-Na MOF,                                                                                          | <b>S3</b> |
| <b>Figure S6</b>  | TGA analysis of Sn-Na MOF and Au Nps/Sn-Na MOF                                                                             | <b>S4</b> |
| <b>Figure S7</b>  | LSV polarization curves of Pt as working electrode (a) HER Performance, (b) OER Performance                                | <b>S4</b> |
| <b>Figure S8</b>  | LSV polarization curves of IrO <sub>2</sub> as working electrode (a) HER Performance, (b) OER Performance                  | <b>S4</b> |
| <b>Figure S9</b>  | LSV polarization curves HER performance of Au NPs/Sn-Na MOF in 1 M KOH using graphite carbon counter electrode             | <b>S5</b> |
| <b>Figure S10</b> | FESEM image of Au NPs/Sn-Na MOF after 72 h stability test                                                                  | <b>S5</b> |
| <b>Figure S11</b> | (a) XPS survey of Au NPs/Sn-Na MOF after catalytic reaction, XPS Spectra of (b) Au 4f, (c) Sn 3d, (d) C 1s, and (e) O 1s   | <b>S6</b> |
| <b>Figure S12</b> | (a) ATR-IR spectra of fresh catalyst and recovered catalyst after catalytic reaction, (b) Magnified view of ATR-IR spectra | <b>S6</b> |
| <b>Table S1</b>   | Previous reported high performance bifunctional catalysts for HER and OER                                                  | <b>S7</b> |

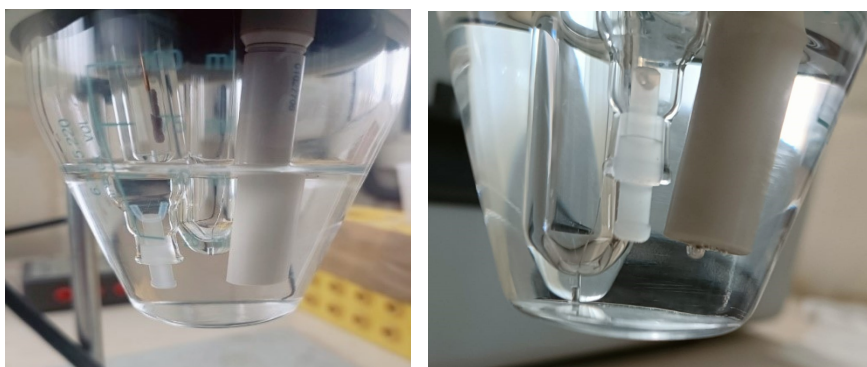

**Fig. S1** Left: Photograph of three-electrode electrochemical cell for overall water splitting; Right: Enlarged view of cell showing bubbling of gases

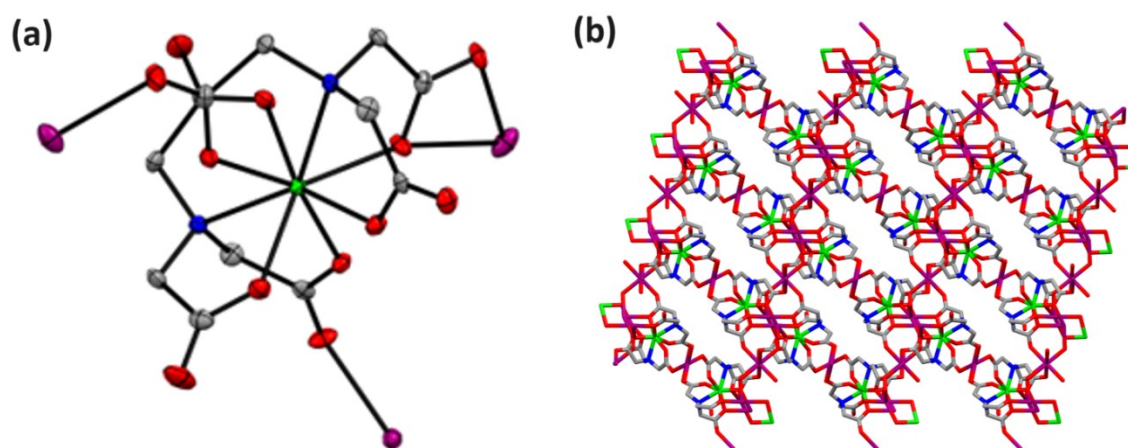

**Fig. S2** (a) Asymmetric unit of Sn-Na MOF, (b) 2D coordination array in Sn-Na MOF.

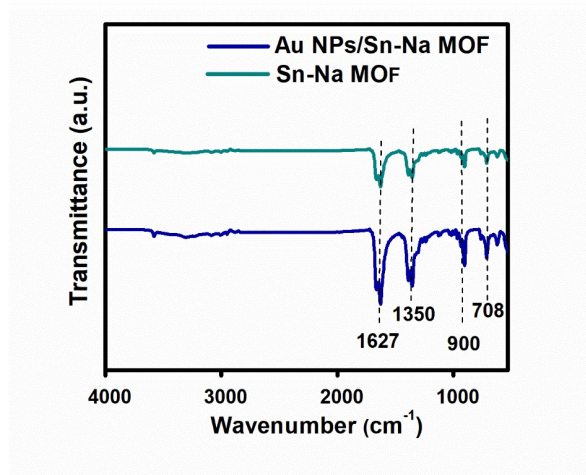

Fig. S3 FTIR spectra of Sn-Na MOF and Au NPs/Sn-Na MOF

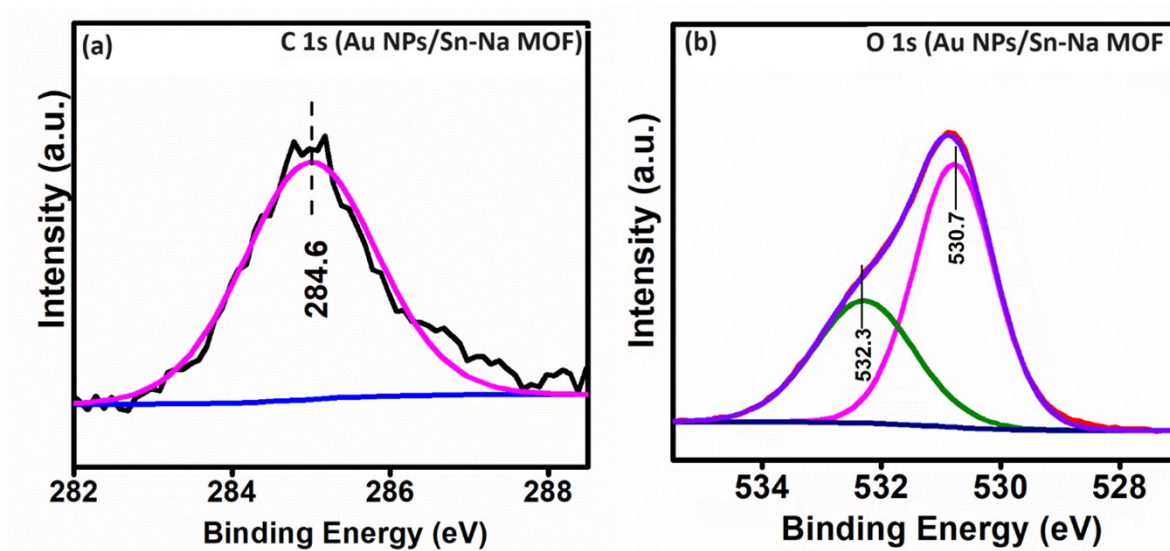

Fig. S4 XPS spectra of (a) C 1s (Au NPs/Sn-Na MOF), (b) O 1s of (Au NPs/Sn-Na MOF)

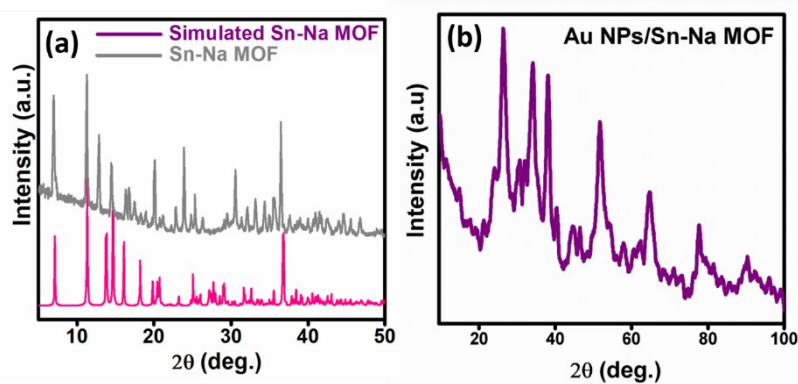

Fig. S5 PXRD patterns of (a) Simulated Sn-Na MOF and Sn-Na MOF, (b) Au Nps/Sn-Na MOF.

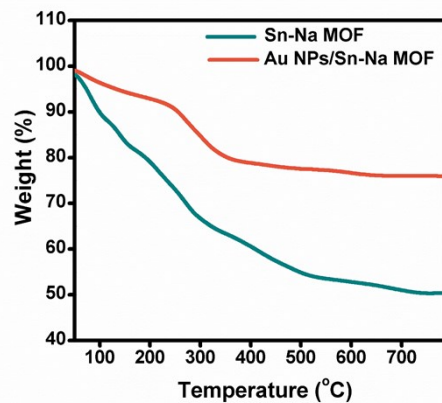

**Fig. S6** TGA analysis of Sn-Na MOF and Au Nps/Sn-Na MOF

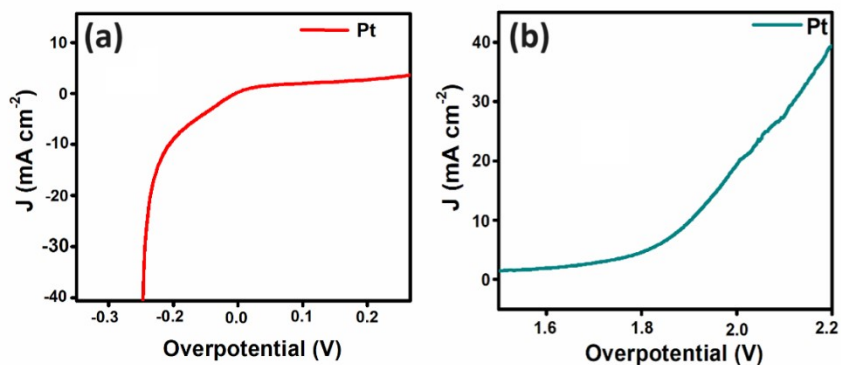

**Fig. S7** LSV polarization curves of Pt as working electrode (a) HER Performance, (b) OER Performance

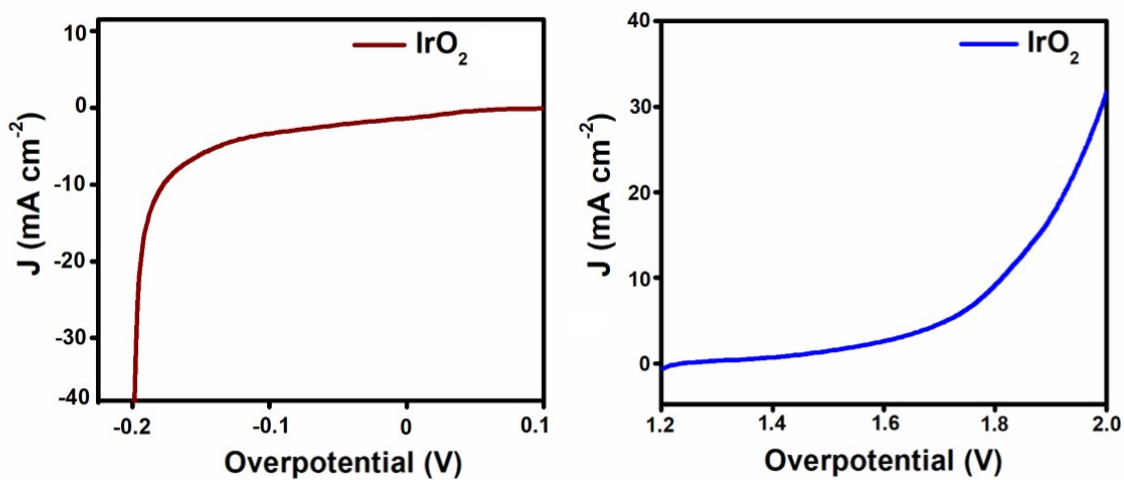

**Fig. S8** LSV polarization curves of IrO<sub>2</sub> as working electrode (a) HER Performance, (b) OER Performance

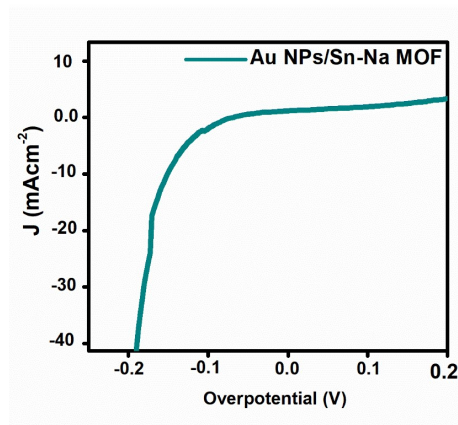

**Fig. S9** LSV polarization curves HER performance of Au NPs/Sn-Na MOF in 1 M KOH using graphite carbon counter electrode

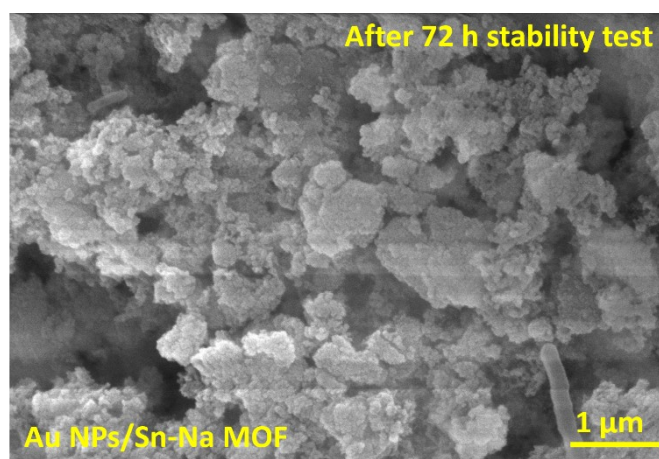

**Fig. S10** FESEM image of Au NPs/Sn-Na MOF after 72 h stability test

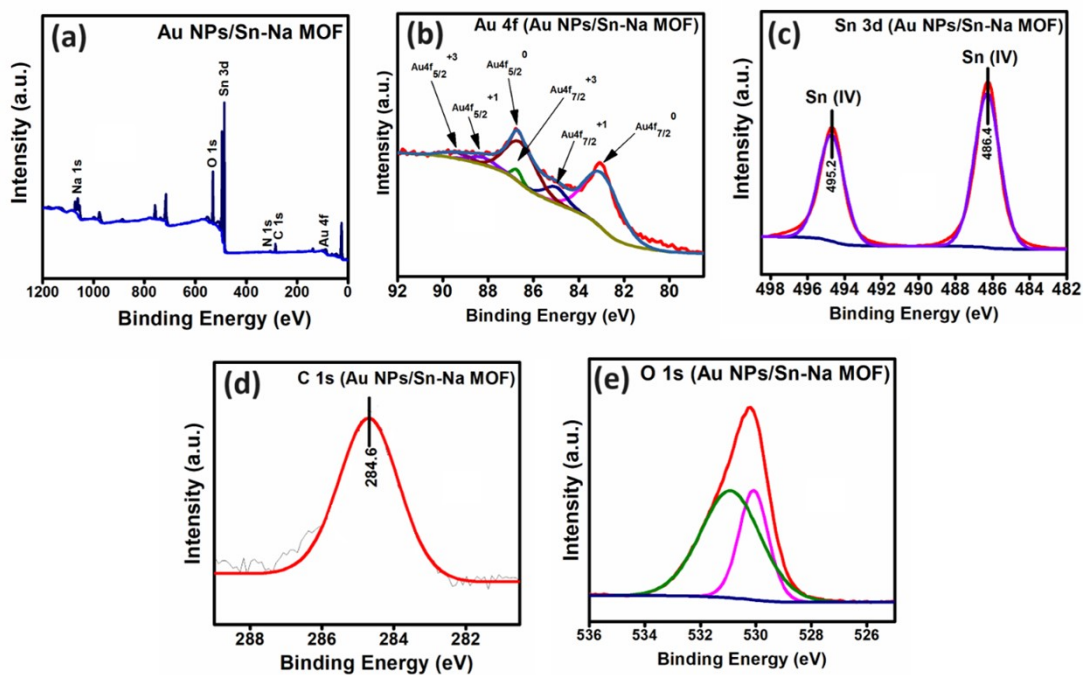

**Fig. S11** (a) XPS survey of Au NPs/Sn-Na MOF after catalytic reaction, XPS Spectra of (b) Au 4f, (c) Sn 3d, (d) C 1s, and (e) O 1s

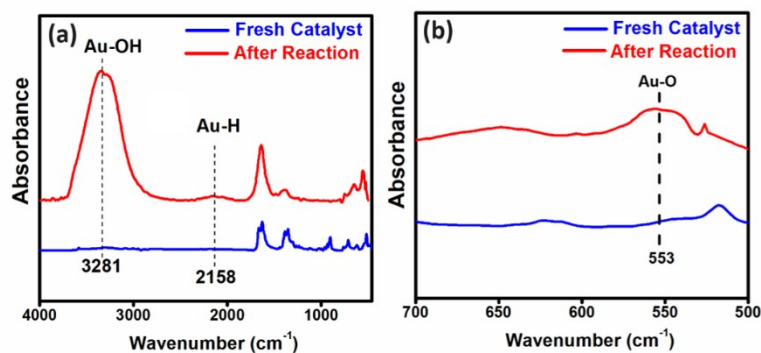

**Fig. S12** ATR-IR spectra of fresh catalyst and recovered catalyst after catalytic reaction.

**Table S1:** Previous reported high performance bifunctional electrocatalysts for HER and OER

| Catalysts                               | Electrolyte                          | Current Density (mA cm <sup>-2</sup> ) | HER Overpotential (mV) | Tafel slope (mV dec <sup>-1</sup> ) (HER) | Substrate                       | OER (Overpotential) | OER (Current Density) | Reference |
|-----------------------------------------|--------------------------------------|----------------------------------------|------------------------|-------------------------------------------|---------------------------------|---------------------|-----------------------|-----------|
| Ni-MOF@Pt                               | 0.5 M H <sub>2</sub> SO <sub>4</sub> | 10                                     | 43                     | 30                                        | GCE                             | -                   | -                     | 17        |
| Ni(OH) <sub>2</sub> /Pt(111)            | 0.1 M KOH                            | 9                                      | 150                    |                                           | GCE                             | -                   | -                     | 20        |
| Pt <sub>1</sub> /N-C                    | 1 M NaOH                             | 10                                     | 46                     | 36.8                                      | Carbon Cloth                    | -                   | -                     | 18        |
| Pt/MoS <sub>2</sub>                     | 0.1 M H <sub>2</sub> SO <sub>4</sub> | 10                                     | 145                    | 96                                        | GCE                             | -                   | -                     | 19        |
| MoS <sub>2</sub> /Au                    | 0.5 M H <sub>2</sub> SO <sub>4</sub> | 10                                     | 330                    | 57                                        | GCE                             | -                   | -                     | 21        |
| CuS/Au                                  | 0.5 M H <sub>2</sub> SO <sub>4</sub> | 10                                     | 179                    | 75                                        | GCE                             | -                   | -                     | 22        |
| RuAu SAA                                | 1 M KOH                              | 10                                     | 20                     | 37                                        | GCE                             | -                   | -                     | 40        |
| Au@PD-COP-II                            | 1 M KOH                              | 50                                     | 184                    | 85                                        | Nickel Foam                     | 288                 | 50                    | 27        |
| NiCo <sub>2</sub> O <sub>4</sub> -P-COP | 0.1 M KOH                            | 10                                     | 144                    | 39                                        | Glassy Carbon                   | 325                 | 45                    | 48        |
| Au@AuIr <sub>2</sub>                    | 0.5 M H <sub>2</sub> SO <sub>4</sub> | 10                                     | 29                     | 58.3                                      | GCE                             | 261                 | 10                    | 27        |
| Au doped kCo-Ni hydroxide               | 6 M NaOH                             | 10                                     | 35                     | 92                                        | GCE                             | 340                 | 10                    | 31        |
| NC-PB@CNT                               | 1 M KOH                              | 10                                     | 152                    | 108                                       | NC-PB@CNT                       | 240                 | 10                    | 32        |
| Ir/MoS <sub>2</sub> Nanoflowers         | 0.5 M H <sub>2</sub> SO <sub>4</sub> | 10                                     | 35                     | 30.78                                     | Ir/MoS <sub>2</sub> Nanoflowers | 270                 | 10                    | 16        |
| Au NPs/Sn-Na MOF                        | 1 M KOH                              | 10                                     | 129                    | 62.3                                      | GCE                             | 650                 | 20                    | This Work |
